# Supplementary material for: Synthesis of the double-shell anatase–rutile TiO2 hollow spheres with enhanced photocatalytic activity
Source: Royal Society of Chemistry journal article supplement (doi:10.1039/c3nr04043g), 2013-01-01
Supplement: c3nr04043g.pdf [file c3nr04043g.pdf]

## Supporting Information

### Synthesis of the Double-Shell Anatase-Rutile TiO<sub>2</sub> Hollow Spheres with the Enhanced Photocatalytic Activity

Shunxing Li<sup>\*a,b</sup>, Jie Chen<sup>a</sup>, Fengying Zheng<sup>a,b</sup>, Yancai Li<sup>a,b</sup> and Fuying Huang<sup>a</sup>

<sup>a</sup> Department of Chemistry & Environmental Science, Minnan Normal University,  
Zhangzhou, China, 363000. E-mail: shunxing\_li@aliyun.com

<sup>b</sup> Fujian Province Key Laboratory of Modern Analytical Science and Separation  
Technology, Minnan Normal University, Zhangzhou, China, 363000. E-mail:  
lishunxing@mnnu.edu.cn

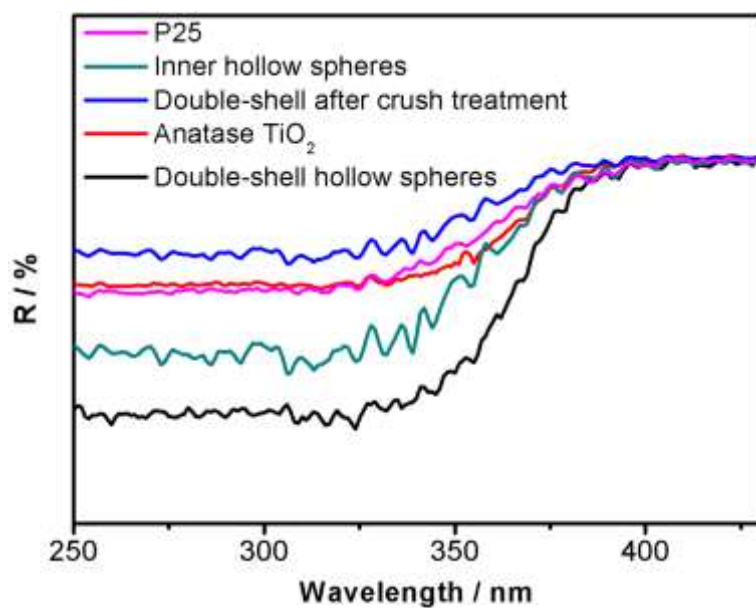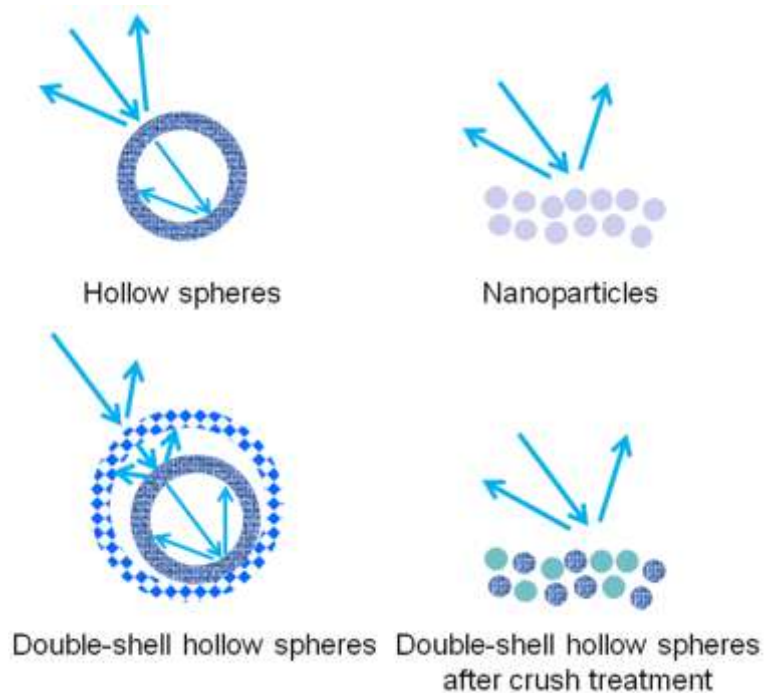

**Fig. S1** UV-Vis diffuse reflection spectra of the double-shell TiO<sub>2</sub> hollow spheres and other TiO<sub>2</sub> samples (P25, anatase TiO<sub>2</sub> nanoparticles, hollow spheres and the crushed double-shell hollow spheres), and the schematic diagram of the light reflection and scattering in these samples.

**Table S1.** Physiochemical properties of different samples

| Samples                              | Specific surface area <sup>a</sup> | Average pore diameter <sup>a</sup> |
|--------------------------------------|------------------------------------|------------------------------------|
|                                      | (m <sup>2</sup> g <sup>-1</sup> )  | (nm)                               |
| Double-shell TiO <sub>2</sub> sphere | 169                                | 3.9(inner) 8.5(outer)              |
| Inner hollow TiO <sub>2</sub>        | 231                                | 3.8                                |
| Outer hollow TiO <sub>2</sub>        | 133                                | 8.5                                |
| Commercial P25                       | 59                                 | —                                  |
| Commercial anatase TiO <sub>2</sub>  | 38                                 | —                                  |

<sup>a</sup>Specific surface areas and average pore sizes of the samples are calculated by using the Brunauer-Emmett-Teller (BET) equation and the Barrett-Joyner-Halenda (BJH) method, respectively.
